# Supplementary material for: Cryopreservation of primary B cells minimally influences their signaling responses
Source: PubMed Central journal article supplement (PMC6281576; doi:10.1038/s41598-018-36121-9), 2018-12-05
Supplement: 41598_2018_36121_MOESM1_ESM.pdf [file 41598_2018_36121_MOESM1_ESM.pdf]

# **Cryopreservation of primary B cells minimally influences their signaling responses**

Johanne U. Hermansen<sup>1</sup>, Geir E. Tjønnfjord<sup>2,3,4</sup>, Ludvig A. Munthe<sup>4,5</sup>, Kjetil Taskén<sup>1,4,6,7</sup>,  
Sigrid S. Skånland<sup>1,4,6,7,\*</sup>

**SUPPLEMENT**

## FIGURE LEGENDS

**Supplementary figure 1. Basal signaling is comparable between different studies on healthy donors.** Comparison of basal phospho-protein levels reported in<sup>4</sup> (Myhrvold *et al.*, n=10) and the present study (Cryo, n=10). See legend to Figure 1 for experimental details. Statistical significance was calculated by a paired t-test with correction for multiple comparisons using the Holm-Sidak's method. No significant *p*-values were identified.

**Supplementary figure 2. BCR signaling is comparable between healthy donors and between different studies.** Comparison of signaling responses reported in<sup>4</sup> (green symbol; mean of n=10 healthy donors,  $\pm$  SEM) and in the present study (cryo and fresh, both n=3). See legend to Figure 4 for experimental details.

# Supplementary figure 1

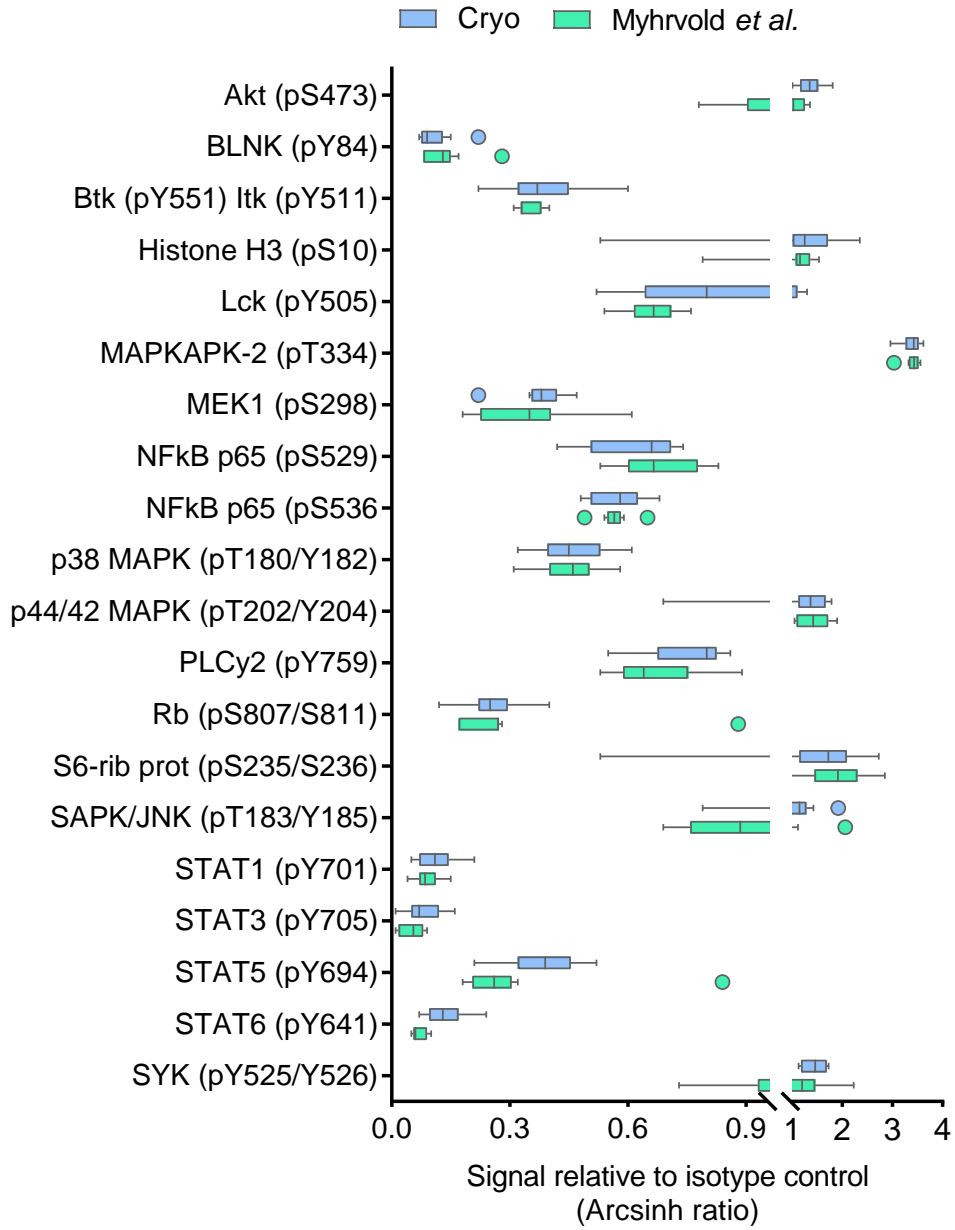

## Supplementary figure 2

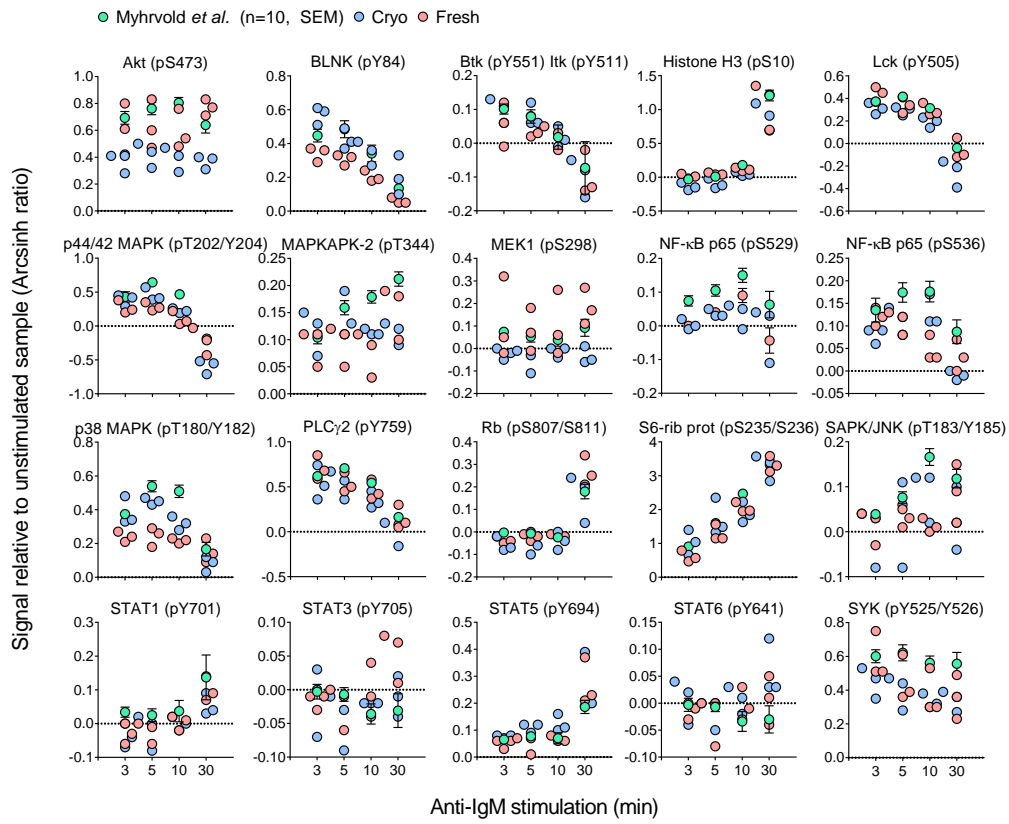

**SUPPLEMENTARY TABLE 1: Antibodies used in the study**

| <b>Antigen</b>                | <b>Vendor*</b> | <b>Clone</b>    | <b>Cat. No.</b> | <b>Fluorochrome</b> |
|-------------------------------|----------------|-----------------|-----------------|---------------------|
| IgG1, Kappa (isotype control) | BD             | MOPC-21         | 557783          | Alexa Fluor 647     |
| AKT (pS473)                   | CST            | D9E             | 4075            | Alexa Fluor 647     |
| BLNK (pY84)                   | BD             | J117-1278       | 558443          | Alexa Fluor 647     |
| Btk (pY551)/Itk (pY511)       | BD             | 24a/BTK (Y551)  | 558134          | Alexa Fluor 647     |
| CD19                          | TFS            | HIB19           | 45-0199-42      | PerCP-Cyanine5.5    |
| Histone H3 (pS10)             | CST            | D2C8            | 9716            | Alexa Fluor 647     |
| Lck (pY505)                   | BD             | 4/LCK-Y505      | 558577          | Alexa Fluor 647     |
| MAPKAPK-2 (pT334)             | CST            | 27B7            | 4320S           | Alexa Fluor 647     |
| MEK1 (pS298)                  | BD             | J114-64         | 560043          | Alexa Fluor 647     |
| NF-κB p65 (pS529)             | BD             | K10-895.12.50   | 558422          | Alexa Fluor 647     |
| NF-κB p65 (pS536)             | CST            | 93H1            | 4887            | Alexa Fluor 647     |
| p38 MAPK (pT180/Y182)         | CST            | 28B10           | 4552            | Alexa Fluor 647     |
| p44/42 MAPK (pT202/Y204)      | CST            | E10             | 4375            | Alexa Fluor 647     |
| PLCγ2 (pY759)                 | BD             | K86-689.37      | 558498          | Alexa Fluor 647     |
| Rb (pS807/pS811)              | BD             | J112-906        | 558590          | Alexa Fluor 647     |
| S6-Ribos. Prot. (pS235/S236)  | CST            | D57.2.2E        | 4851            | Alexa Fluor 647     |
| SAPK/JNK (pT183/Y185)         | CST            | G9              | 9257            | Alexa Fluor 647     |
| STAT1 (pY701)                 | BD             | 4a              | 612597          | Alexa Fluor 647     |
| STAT3 (pY705)                 | BD             | 4/P-STAT3       | 557815          | Alexa Fluor 647     |
| STAT5 (pY694)                 | BD             | 47/Stat5(pY694) | 612599          | Alexa Fluor 647     |
| STAT6 (pY641)                 | BD             | 18/P-Stat6      | 612601          | Alexa Fluor 647     |
| SYK (pY525/Y526)              | CST            | C87C1           | 12081           | Alexa Fluor 647     |

\*BD, Beckton Dickinson Pharmingen; CST, Cell Signaling Technologies; TFS, ThermoFisher Scientific
